# Supplementary material
Source: Springer Nature journal article supplement (https://www.springermedizin.de/resource/supplementary/12879_2012_1975_MOESM4_ESM.pdf/9443502)
Supplement: MOESM4 [file 9443502]

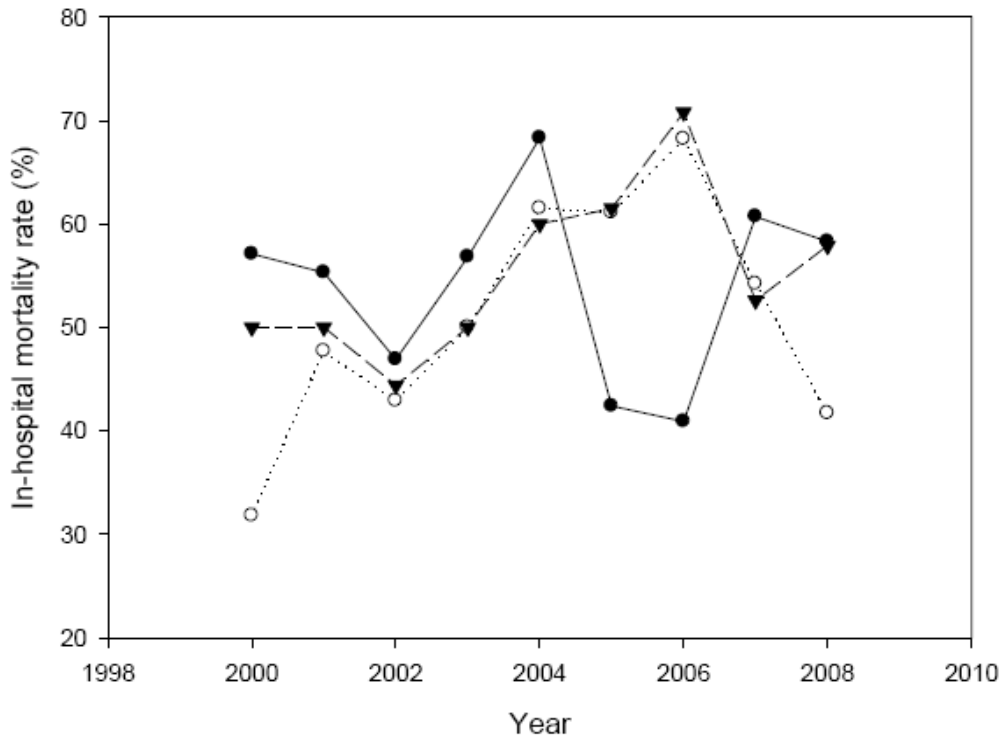

Total number of infected

|        |    |    |    |    |    |    |    |    |    |
|--------|----|----|----|----|----|----|----|----|----|
| VAP    | 21 | 47 | 32 | 44 | 41 | 33 | 22 | 28 | 24 |
| CAUTI  | 44 | 44 | 42 | 36 | 39 | 18 | 22 | 59 | 48 |
| CLABSI | 28 | 26 | 27 | 18 | 15 | 13 | 24 | 19 | 19 |

- Ventilator associated pneumonia (VAP, mean 54.8%,  $p=0.986$ )
- Catheter-associated urinary tract infection (CAUTI, mean 49.1%,  $p=0.102$ )
- - -▼- - - Central-line associated bloodstream infection (CLABSI, mean 54.5%,  $p=0.174$ )
